# Supplementary material for: Gaps in Border Controls Are Related to Quarantine Alien Insect Invasions in Europe
Source: PubMed Central journal article supplement (PMC3480426; doi:10.1371/journal.pone.0047689), 2012-10-24
Supplement: pone.0047689.s005.pdf [file pone.0047689.s005.pdf]

**Table S4.** Country origin of agricultural imports by Europe for the 5-year period 2003 to 2007. For each non-European country, data shown are; the total value of agricultural exports to Europe (US\$th, FAO), the Trade Volume to be inspected (TV), the number of quarantine alien insect interceptions (EPPO), the Trade Volume to be inspected Per Interception (TVPI) (ranked), and Nominal GDP (\$, IMF).

| Country                        | Continent     | Agr. Exports<br>Europe, \$th<br>03-07 | TV<br>\$th | #alien insect<br>interceptions<br>03-07 | TVPI<br>\$th      | Nominal<br>GDP, \$<br>03-07 |
|--------------------------------|---------------|---------------------------------------|------------|-----------------------------------------|-------------------|-----------------------------|
| United States of America       | North America | 4'182'838                             | 42'633'839 | 0                                       | <b>42'633'839</b> | 42'571'159                  |
| Brazil                         | SC America    | 5'915'677                             | 40'271'643 | 1                                       | <b>20'135'821</b> | 4'955'055                   |
| Argentina                      | SC America    | 1'225'807                             | 8'715'420  | 0                                       | <b>8'715'420</b>  | 4'863'177                   |
| Colombia                       | SC America    | 1'276'298                             | 6'344'349  | 0                                       | <b>6'344'349</b>  | 3'399'121                   |
| Ecuador                        | SC America    | 997'984                               | 3'781'055  | 0                                       | <b>3'781'055</b>  | 2'781'606                   |
| Canada                         | North America | 1'074'825                             | 3'664'491  | 0                                       | <b>3'664'491</b>  | 35'262'906                  |
| Costa Rica                     | SC America    | 1'187'561                             | 5'115'633  | 1                                       | <b>2'557'817</b>  | 4'902'767                   |
| Morocco                        | Africa        | 817'225                               | 3'815'126  | 1                                       | <b>1'907'563</b>  | 2'025'547                   |
| Paraguay                       | SC America    | 302'406                               | 1'573'722  | 0                                       | <b>1'573'722</b>  | 1'418'230                   |
| Panama                         | SC America    | 318'304                               | 1'566'518  | 0                                       | <b>1'566'518</b>  | 4'909'914                   |
| Mexico                         | SC America    | 248'253                               | 1'553'421  | 0                                       | <b>1'553'421</b>  | 8'209'584                   |
| Côte d'Ivoire                  | Africa        | 1'339'853                             | 3'084'250  | 1                                       | <b>1'542'125</b>  | 870'858                     |
| Indonesia                      | Asia          | 364'544                               | 1'307'436  | 0                                       | <b>1'307'436</b>  | 1'427'782                   |
| Chile                          | SC America    | 802'527                               | 1'139'387  | 0                                       | <b>1'139'387</b>  | 7'361'469                   |
| Honduras                       | SC America    | 298'096                               | 1'006'989  | 0                                       | <b>1'006'989</b>  | 1'443'809                   |
| Russian Federation             | Asia          | 278'224                               | 798'656    | 0                                       | <b>798'656</b>    | 5'692'290                   |
| Peru                           | SC America    | 483'367                               | 1'549'716  | 1                                       | <b>774'858</b>    | 2'995'499                   |
| Cameroon                       | Africa        | 491'598                               | 2'131'749  | 2                                       | <b>710'583</b>    | 941'906                     |
| Israel                         | Asia          | 605'641                               | 2'627'398  | 3                                       | <b>656'849</b>    | 20'666'092                  |
| Australia                      | Oceania       | 126'067                               | 558'575    | 0                                       | <b>558'575</b>    | 35'578'433                  |
| Malawi                         | Africa        | 191'321                               | 529'092    | 0                                       | <b>529'092</b>    | 222'067                     |
| Viet Nam                       | Asia          | 718'014                               | 2'640'000  | 5                                       | <b>440'000</b>    | 647'829                     |
| Uruguay                        | SC America    | 167'299                               | 796'844    | 1                                       | <b>398'422</b>    | 5'256'941                   |
| South Africa                   | Africa        | 1'163'913                             | 12'914'827 | 32                                      | <b>391'358</b>    | 5'026'507                   |
| Sri Lanka                      | Asia          | 123'557                               | 387'714    | 0                                       | <b>387'714</b>    | 1'268'384                   |
| Uganda                         | Africa        | 177'061                               | 659'610    | 1                                       | <b>329'805</b>    | 315'436                     |
| Papua New Guinea               | Oceania       | 85'789                                | 296'311    | 0                                       | <b>296'311</b>    | 847'662                     |
| Nigeria                        | Africa        | 352'039                               | 1'397'474  | 4                                       | <b>279'495</b>    | 840'543                     |
| Tunisia                        | Africa        | 102'431                               | 265'748    | 0                                       | <b>265'748</b>    | 3'269'691                   |
| Belize                         | SC America    | 50'547                                | 255'311    | 0                                       | <b>255'311</b>    | 3'855'652                   |
| El Salvador                    | SC America    | 84'893                                | 254'696    | 0                                       | <b>254'696</b>    | 3'074'607                   |
| New Zealand                    | Oceania       | 477'044                               | 250'926    | 0                                       | <b>250'926</b>    | 25'572'932                  |
| Nicaragua                      | SC America    | 78'080                                | 240'115    | 0                                       | <b>240'115</b>    | 947'066                     |
| Guatemala                      | SC America    | 203'418                               | 1'177'747  | 4                                       | <b>235'549</b>    | 2'153'845                   |
| Venezuela (Bolivarian Rep. of) | SC America    | 36'878                                | 198'719    | 0                                       | <b>198'719</b>    | 5'622'827                   |
| Mozambique                     | Africa        | 58'294                                | 171'909    | 0                                       | <b>171'909</b>    | 329'185                     |
| Syrian Arab Republic           | Asia          | 50'014                                | 161'055    | 0                                       | <b>161'055</b>    | 1'618'681                   |
| Swaziland                      | Africa        | 16'953                                | 149'713    | 0                                       | <b>149'713</b>    | 2'421'102                   |
| Cuba                           | SC America    | 24'690                                | 146'724    | 0                                       | <b>146'724</b>    | -                           |
| Ethiopia                       | Africa        | 187'553                               | 380'237    | 2                                       | <b>126'746</b>    | 174'058                     |
| Saint Lucia                    | SC America    | 27'736                                | 110'494    | 0                                       | <b>110'494</b>    | -                           |
| Togo                           | Africa        | 86'751                                | 173'659    | 1                                       | <b>86'830</b>     | 339'668                     |
| Saint Vincent & the Grenadines | SC America    | 14'894                                | 74'209     | 0                                       | <b>74'209</b>     | -                           |
| Burundi                        | Africa        | 36'352                                | 72'541     | 0                                       | <b>72'541</b>     | 105'089                     |
| Guinea                         | Africa        | 34'494                                | 70'662     | 0                                       | <b>70'662</b>     | 370'679                     |
| Iran (Islamic Republic of)     | Asia          | 212'229                               | 64'383     | 0                                       | <b>64'383</b>     | 2'858'702                   |
| Rwanda                         | Africa        | 32'346                                | 63'210     | 0                                       | <b>63'210</b>     | 294'086                     |
| Kazakhstan                     | Asia          | 62'335                                | 61'520     | 0                                       | <b>61'520</b>     | 4'122'165                   |
| Dominica                       | SC America    | 9'629                                 | 56'220     | 0                                       | <b>56'220</b>     | 4'180'862                   |
| Lao People's Democratic Rep.   | Asia          | 12'996                                | 51'655     | 0                                       | <b>51'655</b>     | 503'912                     |
| Namibia                        | Africa        | 25'150                                | 50'049     | 0                                       | <b>50'049</b>     | 3'620'877                   |
| Jamaica                        | Africa        | 22'481                                | 99'067     | 1                                       | <b>49'534</b>     | 4'183'008                   |
| Lebanon                        | Africa        | 15'545                                | 48'101     | 0                                       | <b>48'101</b>     | 5'936'861                   |
| Algeria                        | Africa        | 21'316                                | 46'623     | 0                                       | <b>46'623</b>     | 3'055'781                   |
| Egypt                          | Africa        | 347'464                               | 1'204'932  | 29                                      | <b>40'164</b>     | 1'383'542                   |
| Guyana                         | SC America    | 37'179                                | 37'600     | 0                                       | <b>37'600</b>     | 1'832'026                   |
| Japan                          | Asia          | 9'074                                 | 35'339     | 0                                       | <b>35'339</b>     | 34'648'865                  |
| India                          | Asia          | 811'234                               | 3'309'562  | 109                                     | <b>30'087</b>     | 731'876                     |

| Country                          | Continent  | Agr. Exports          | TV<br>\$th | #alien insect          | TVPI<br>\$th  | Nominal          |
|----------------------------------|------------|-----------------------|------------|------------------------|---------------|------------------|
|                                  |            | Europe, \$th<br>03-07 |            | interceptions<br>03-07 |               | GDP, \$<br>03-07 |
| Philippines                      | Asia       | 17'621                | 80'064     | 2                      | <b>26'688</b> | 1'229'518        |
| Mali                             | Africa     | 5'437                 | 26'239     | 0                      | <b>26'239</b> | 446'431          |
| Republic of Korea                | Asia       | 10'664                | 23'051     | 0                      | <b>23'051</b> | -                |
| Burkina Faso                     | Africa     | 7'971                 | 45'746     | 1                      | <b>22'873</b> | 416'550          |
| Madagascar                       | Africa     | 64'170                | 22'847     | 0                      | <b>22'847</b> | 296'445          |
| Ghana                            | Africa     | 750'180               | 1'477'080  | 65                     | <b>22'380</b> | 522'440          |
| Bolivia (Plurinational State of) | SC America | 15'826                | 20'637     | 0                      | <b>20'637</b> | 1'083'332        |
| Iraq                             | Asia       | 5'125                 | 20'405     | 0                      | <b>20'405</b> | 1'392'255        |
| Malaysia                         | Asia       | 8'724                 | 38'513     | 1                      | <b>19'256</b> | 5'508'802        |
| Kenya                            | Africa     | 462'082               | 2'544'339  | 166                    | <b>15'236</b> | 611'031          |
| Zimbabwe                         | Africa     | 167'212               | 932'302    | 63                     | <b>14'567</b> | 429'019          |
| Jordan                           | Asia       | 9'456                 | 39'520     | 2                      | <b>13'173</b> | 2'456'125        |
| United Arab Emirates             | Asia       | 9'656                 | 12'883     | 0                      | <b>12'883</b> | 34'756'117       |
| Senegal                          | Africa     | 32'047                | 230'362    | 17                     | <b>12'798</b> | 756'324          |
| Singapore                        | Asia       | 5'024                 | 12'350     | 0                      | <b>12'350</b> | 29'217'585       |
| Haiti                            | SC America | 4'765                 | 11'523     | 0                      | <b>11'523</b> | 459'013          |
| Saudi Arabia                     | Asia       | 2'270                 | 10'830     | 0                      | <b>10'830</b> | 13'090'174       |
| Sao Tome and Principe            | Africa     | 5'259                 | 10'490     | 0                      | <b>10'490</b> | -                |
| Bahamas                          | SC America | 1'830                 | 8'425      | 0                      | <b>8'425</b>  | -                |
| Myanmar                          | Asia       | 4'812                 | 8'402      | 0                      | <b>8'402</b>  | 242'891          |
| Sudan                            | Africa     | 7'746                 | 16'334     | 1                      | <b>8'167</b>  | 838'250          |
| Zambia                           | Africa     | 50'056                | 211'868    | 26                     | <b>7'847</b>  | 700'249          |
| Pakistan                         | Asia       | 76'937                | 461'157    | 65                     | <b>6'987</b>  | 733'784          |
| Congo                            | Africa     | 13'504                | 27'002     | 3                      | <b>6'750</b>  | 1'791'527        |
| Democratic Rep. Congo            | Africa     | 13'363                | 6'671      | 0                      | <b>6'671</b>  | 131'950          |
| China, Hong Kong SAR             | Asia       | 1'555                 | 5'937      | 0                      | <b>5'937</b>  | -                |
| Dominican Republic               | SC America | 171'836               | 783'678    | 136                    | <b>5'720</b>  | 3'343'070        |
| Liberia                          | Africa     | 2'787                 | 5'621      | 0                      | <b>5'621</b>  | 157'417          |
| Benin                            | Africa     | 2'474                 | 4'974      | 0                      | <b>4'974</b>  | 529'055          |
| Bangladesh                       | Asia       | 14'682                | 40'919     | 8                      | <b>4'547</b>  | 409'426          |
| Trinidad and Tobago              | SC America | 2'183                 | 4'443      | 0                      | <b>4'443</b>  | -                |
| Central African Republic         | Africa     | 1'822                 | 3'615      | 0                      | <b>3'615</b>  | 337'055          |
| Mauritius                        | Africa     | 1'852                 | 3'489      | 0                      | <b>3'489</b>  | 5'200'123        |
| Thailand                         | Asia       | 172'729               | 715'728    | 223                    | <b>3'195</b>  | 2'869'878        |
| Niger                            | Africa     | 647                   | 1'982      | 0                      | <b>1'982</b>  | 266'855          |
| Kyrgyzstan                       | Asia       | 4'121                 | 1'971      | 0                      | <b>1'971</b>  | 513'086          |
| Grenada                          | SC America | 7'172                 | 1'969      | 0                      | <b>1'969</b>  | 5'218'437        |
| Uzbekistan                       | Asia       | 1'686                 | 1'872      | 0                      | <b>1'872</b>  | 570'276          |
| Sierra Leone                     | Africa     | 15'961                | 32'097     | 17                     | <b>1'783</b>  | 247'830          |
| Angola                           | Africa     | 577                   | 1'725      | 0                      | <b>1'725</b>  | 2'163'672        |
| Gambia                           | Africa     | 3'008                 | 15'154     | 8                      | <b>1'684</b>  | 426'290          |
| Afghanistan                      | Asia       | 1'411                 | 1'574      | 0                      | <b>1'574</b>  | 260'246          |
| Yemen                            | Asia       | 821                   | 1'507      | 0                      | <b>1'507</b>  | 786'119          |
| Antigua and Barbuda              | SC America | 778                   | 1'318      | 0                      | <b>1'318</b>  | 11'292'209       |
| Vanuatu                          | Oceania    | 521                   | 1'008      | 0                      | <b>1'008</b>  | 1'924'805        |
| Nepal                            | Asia       | 656                   | 993        | 0                      | <b>993</b>    | 306'364          |
| Cambodia                         | Asia       | 713                   | 822        | 0                      | <b>822</b>    | 470'109          |
| Guam                             | Oceania    | 172                   | 800        | 0                      | <b>800</b>    | -                |
| Suriname                         | SC America | 20'272                | 76'878     | 145                    | <b>527</b>    | 3'641'682        |
| Mauritania                       | Africa     | 269                   | 509        | 0                      | <b>509</b>    | 712'652          |
| Oman                             | Asia       | 78                    | 486        | 0                      | <b>486</b>    | 11'818'342       |
| New Caledonia                    | Oceania    | 344                   | 353        | 0                      | <b>353</b>    | -                |
| Libyan Arab Jamahiriya           | Africa     | 119                   | 352        | 0                      | <b>352</b>    | 7'894'435        |
| Turks and Caicos Islands         | SC America | 324                   | 320        | 0                      | <b>320</b>    | -                |
| Tonga                            | Oceania    | 169                   | 281        | 0                      | <b>281</b>    | 2'652'381        |
| British Virgin Islands           | SC America | 469                   | 277        | 0                      | <b>277</b>    | -                |
| Guinea-Bissau                    | Africa     | 398                   | 275        | 0                      | <b>275</b>    | 391'934          |
| Gabon                            | Africa     | 126                   | 229        | 0                      | <b>229</b>    | 6'261'531        |
| Cayman Islands                   | SC America | 408                   | 202        | 0                      | <b>202</b>    | -                |
| Barbados                         | SC America | 29                    | 195        | 0                      | <b>195</b>    | 12'532'618       |
| Saint Kitts and Nevis            | SC America | 91                    | 168        | 0                      | <b>168</b>    | -                |
| Kiribati                         | Oceania    | 140                   | 144        | 0                      | <b>144</b>    | 1'133'366        |
| Bahrain                          | Asia       | 134                   | 141        | 0                      | <b>141</b>    | 18'595'501       |
| Seychelles                       | Africa     | 114                   | 121        | 0                      | <b>121</b>    | 10'900'356       |
| Cape Verde                       | Africa     | 60                    | 114        | 0                      | <b>114</b>    | 2'152'481        |
| Brunei Darussalam                | Asia       | 22                    | 69         | 0                      | <b>69</b>     | 25'581'556       |

| Country                        | Continent     | Agr. Exports      | TV                 | #alien insect | TVPI           | Nominal    |
|--------------------------------|---------------|-------------------|--------------------|---------------|----------------|------------|
|                                |               | Europe, \$th      |                    | interceptions |                | GDP, \$    |
|                                |               | 03-07             | \$th               | 03-07         | \$th           | 03-07      |
| Solomon Islands                | Asia          | 28                | 68                 | 0             | 68             | 913'016    |
| Somalia                        | Africa        | 27                | 64                 | 0             | 64             | -          |
| Tajikistan                     | Asia          | 45                | 59                 | 0             | 59             | 360'965    |
| Netherlands Antilles           | SC America    | 1'325             | 56                 | 0             | 56             | -          |
| Saint Helena                   | Africa        | 27                | 53                 | 0             | 53             | -          |
| Eritrea                        | Africa        | 27                | 34                 | 0             | 34             | 251'236    |
| Marshall Islands               | Oceania       | 29                | 29                 | 0             | 29             | -          |
| Lesotho                        | Africa        | 19                | 26                 | 0             | 26             | 555'001    |
| EQUATORIAL GUINEA              | Africa        | 4'346             | 25                 | 0             | 25             | 6'668'946  |
| Kuwait                         | Asia          | 19                | 25                 | 0             | 25             | 26'788'608 |
| Bermuda                        | North America | 156               | 20                 | 0             | 20             | -          |
| Maldives                       | Asia          | 20                | 19                 | 0             | 19             | 2'836'786  |
| Bhutan                         | Asia          | 18                | 18                 | 0             | 18             | 1'278'264  |
| Samoa                          | Oceania       | 2                 | 11                 | 0             | 11             | 2'340'122  |
| Democratic People's Rep. Korea | Asia          | 10                | 10                 | 0             | 10             | 17'478'132 |
| Comoros                        | Africa        | 7'707             | 9                  | 0             | 9              | 632'957    |
| French Polynesia               | Oceania       | 1'417             | 9                  | 0             | 9              | -          |
| Chad                           | Africa        | 11                | 8                  | 0             | 8              | 578'306    |
| Cook Islands                   | Oceania       | 4                 | 6                  | 0             | 6              | -          |
| Fiji                           | Asia          | 12                | 2                  | 0             | 2              | 3'428'883  |
| Qatar                          | Asia          | 2                 | 1                  | 0             | 1              | -          |
| Turkmenistan                   | Asia          | 7                 | 1                  | 0             | 1              | -          |
| Botswana                       | Africa        | 0                 | 0                  | 0             | 0              | -          |
| Unspecified                    | -             | 55'415            | 0                  | 0             | 0              | -          |
| United Republic of Tanzania    | Africa        | 141'862           | 0                  | 0             | 0              | -          |
| Tuvalu                         | Oceania       | 0                 | 0                  | 0             | 0              | -          |
| Timor-Leste                    | Asia          | 848               | 0                  | 0             | 0              | -          |
| TANZANIA                       | Africa        | 0                 | 0                  | 15            | 0              | -          |
| TAIWAN                         | Asia          | 0                 | 0                  | 0             | 0              | -          |
| Saint Pierre and Miquelon      | North America | 0                 | 0                  | 0             | 0              | -          |
| PUERTO RICO                    | SC America    | 0                 | 0                  | 0             | 0              | -          |
| Occupied Palestinian Territory | Asia          | 2'450             | 0                  | 0             | 0              | -          |
| Niue                           | Oceania       | 0                 | 0                  | 0             | 0              | -          |
| Nauru                          | Oceania       | 5                 | 0                  | 0             | 0              | -          |
| Mongolia                       | Asia          | 1'067             | 0                  | 0             | 0              | -          |
| Mayotte                        | Africa        | 255               | 0                  | 0             | 0              | -          |
| Greenland                      | North America | 13'311            | 0                  | 0             | 0              | -          |
| FRENCH GUIANA                  | SC America    | 0                 | 0                  | 1             | 0              | -          |
| Falkland Islands (Malvinas)    | SC America    | 13                | 0                  | 0             | 0              | -          |
| Djibouti                       | Africa        | 1'141             | 0                  | 0             | 0              | -          |
| China, Macao SAR               | Asia          | 35                | 0                  | 1             | 0              | -          |
| Aruba                          | SC America    | 886               | 0                  | 0             | 0              | -          |
| American Samoa                 | Oceania       | 142               | 0                  | 0             | 0              | -          |
| <b>World Total</b>             |               | <b>30'924'242</b> | <b>170'157'879</b> | <b>1'165</b>  | <b>145'933</b> | <b>-</b>   |
