# Supplementary material for: Gaps in Border Controls Are Related to Quarantine Alien Insect Invasions in Europe
Source: PubMed Central journal article supplement (PMC3480426; doi:10.1371/journal.pone.0047689), 2012-10-24
Supplement: pone.0047689.s006.pdf [file pone.0047689.s006.pdf]

**Table S5.** Agricultural commodity imports by Europe for the 5-year period 2003 to 2007. For each FAO commodity, data shown are; the total value of exports to Europe (US\$th), the Trade Volume to be inspected (TV), the number of quarantine alien insect interceptions (EPPO), and the Trade Volume to be inspected Per Interception (TVPI) (ranked).

| Commodity                    | Plant Order  | Agr. Exports          | #alien insect |                        | TVPI<br>\$th |
|------------------------------|--------------|-----------------------|---------------|------------------------|--------------|
|                              |              | Europe, \$th<br>03-07 | TV<br>\$th    | interceptions<br>03-07 |              |
| Soybeans                     | Fabales      | 4'950'150             | 39'343'233    | 0                      | 39'343'233   |
| Tobacco, unmanufactured      | Solanales    | 3'572'099             | 17'990'832    | 0                      | 17'990'832   |
| Coffee, green                | Gentianales  | 5'081'574             | 16'651'889    | 0                      | 16'651'889   |
| Bananas                      | Zingiberales | 4'805'542             | 14'556'996    | 0                      | 14'556'996   |
| Wheat                        | Poales       | 5'187'496             | 7'429'482     | 0                      | 7'429'482    |
| Almonds Shelled              | Rosales      | 1'400'920             | 7'118'478     | 0                      | 7'118'478    |
| Grapes                       | Vitales      | 2'400'107             | 7'097'462     | 0                      | 7'097'462    |
| Cocoa beans                  | Malvales     | 2'945'590             | 6'035'139     | 0                      | 6'035'139    |
| Maize                        | Poales       | 3'620'419             | 9'455'627     | 2                      | 3'151'876    |
| Apples                       | Rosales      | 2'538'251             | 3'077'694     | 0                      | 3'077'694    |
| Pineapples                   | Poales       | 977'738               | 2'086'091     | 0                      | 2'086'091    |
| Sorghum                      | Poales       | 245'873               | 1'519'732     | 0                      | 1'519'732    |
| Rice Husked                  | Poales       | 552'206               | 1'497'134     | 0                      | 1'497'134    |
| Tea                          | Ericales     | 873'259               | 1'200'492     | 0                      | 1'200'492    |
| Cashew Nuts Shelled          | Sapindales   | 446'809               | 1'135'231     | 0                      | 1'135'231    |
| Avocados                     | Laurales     | 463'418               | 960'069       | 0                      | 960'069      |
| Sunflower seed               | Asterales    | 811'743               | 870'614       | 0                      | 870'614      |
| Plums and sloes              | Rosales      | 351'210               | 743'137       | 0                      | 743'137      |
| Pears                        | Rosales      | 953'046               | 1'360'868     | 1                      | 680'434      |
| Walnuts, with shell          | Fagales      | 152'197               | 661'593       | 0                      | 661'593      |
| Chick peas                   | Fabales      | 132'413               | 556'614       | 0                      | 556'614      |
| Walnuts Shelled              | Fagales      | 257'943               | 517'688       | 0                      | 517'688      |
| Lemons and limes             | Sapindales   | 802'264               | 2'715'689     | 5                      | 452'615      |
| Grapefruit (inc. pomelos)    | Sapindales   | 470'202               | 3'054'155     | 6                      | 436'308      |
| Cherries                     | Rosales      | 368'524               | 410'722       | 0                      | 410'722      |
| Tangerines, mandarins, clem. | Sapindales   | 1'683'692             | 2'023'188     | 4                      | 404'638      |
| Dates                        | Arecales     | 189'378               | 393'772       | 0                      | 393'772      |
| Groundnuts, with shell       | Fabales      | 64'944                | 389'789       | 0                      | 389'789      |
| Lentils                      | Fabales      | 105'596               | 385'116       | 0                      | 385'116      |
| Maize, green                 | Poales       | 84'892                | 347'259       | 0                      | 347'259      |
| Tomatoes                     | Solanales    | 3'250'344             | 1'653'433     | 6                      | 236'205      |
| Rice Broken                  | Poales       | 157'380               | 197'792       | 0                      | 197'792      |
| Oranges                      | Sapindales   | 1'940'473             | 5'657'254     | 28                     | 195'078      |
| Strawberries                 | Rosales      | 910'495               | 170'293       | 0                      | 170'293      |
| Papayas                      | Brassicales  | 87'850                | 138'450       | 0                      | 138'450      |
| Carobs                       | Fabales      | 65'669                | 132'530       | 0                      | 132'530      |
| Peaches and nectarines       | Rosales      | 1'105'919             | 341'208       | 2                      | 113'736      |
| Rapeseed                     | Brassicales  | 1'222'029             | 112'947       | 0                      | 112'947      |
| Barley                       | Poales       | 1'279'195             | 110'810       | 0                      | 110'810      |
| Garlic                       | Asparagales  | 256'365               | 107'425       | 0                      | 107'425      |
| Lettuce and chicory          | Asterales    | 1'245'420             | 103'252       | 0                      | 103'252      |
| Pumpkins, squash and gourds  | Cucurbitales | 354'514               | 188'636       | 1                      | 94'318       |
| Almonds, with shell          | Rosales      | 28'628                | 73'431        | 0                      | 73'431       |
| Apricots                     | Rosales      | 211'812               | 71'851        | 0                      | 71'851       |
| Chillies and peppers, green  | Solanales    | 1'855'912             | 1'538'650     | 21                     | 69'939       |
| Beans, green                 | Fabales      | 495'639               | 2'190'053     | 34                     | 62'573       |
| Cranberries                  | Ericales     | 65'054                | 56'996        | 0                      | 56'996       |
| Raspberries                  | Rosales      | 159'036               | 52'208        | 0                      | 52'208       |
| Rice, paddy                  | Poales       | 56'708                | 40'891        | 0                      | 40'891       |
| Linseed                      | Malpighiales | 291'554               | 36'457        | 0                      | 36'457       |
| Plantains                    | Zingiberales | 109'549               | 35'747        | 0                      | 35'747       |

| Commodity                      | Plant Order    | Agr. Exports | #alien insect |               | TVPI   |
|--------------------------------|----------------|--------------|---------------|---------------|--------|
|                                |                | Europe, \$th | TV            | interceptions | \$th   |
|                                |                | 03-07        | \$th          | 03-07         |        |
| Figs                           | Rosales        | 52'835       | 34'976        | 0             | 34'976 |
| Watermelons                    | Cucurbitales   | 369'525      | 303'296       | 8             | 33'700 |
| Coconuts                       | Arecales       | 30'943       | 62'400        | 1             | 31'200 |
| Carrots and turnips            | Apiales        | 319'990      | 26'309        | 0             | 26'309 |
| Broad beans, horse beans, dry  | Fabales        | 46'674       | 40'682        | 1             | 20'341 |
| Palm kernels                   | Arecales       | 8'428        | 17'837        | 0             | 17'837 |
| Cauliflowers and broccoli      | Brassicales    | 415'141      | 17'344        | 0             | 17'344 |
| Mangoes, mangosteens, guavas   | Sapindales     | 422'431      | 1'940'793     | 115           | 16'731 |
| Sweet potatoes                 | Solanales      | 57'832       | 121'267       | 8             | 13'474 |
| Cabbages and other brassicas   | Brassicales    | 382'235      | 47'412        | 3             | 11'853 |
| Ginger                         | Zingiberales   | 36'312       | 10'943        | 0             | 10'943 |
| Hazelnuts, with shell          | Fagales        | 27'300       | 10'191        | 0             | 10'191 |
| Artichokes                     | Asterales      | 53'543       | 10'014        | 0             | 10'014 |
| Other melons (inc.cantaloupes) | Cucurbitales   | 765'091      | 1'907'500     | 224           | 8'478  |
| String beans                   | Fabales        | 1'178        | 7'773         | 0             | 7'773  |
| Cucumbers and gherkins         | Cucurbitales   | 936'879      | 33'337        | 4             | 6'667  |
| Asparagus                      | Asparagales    | 335'910      | 40'823        | 6             | 5'832  |
| Chicory roots                  | Asterales      | 9'006        | 3'732         | 0             | 3'732  |
| Cashew nuts, with shell        | Sapindales     | 11'062       | 3'656         | 0             | 3'656  |
| Oats                           | Poales         | 111'031      | 3'556         | 0             | 3'556  |
| Blueberries                    | Ericales       | 51'448       | 3'425         | 0             | 3'425  |
| Peas, green                    | Fabales        | 148'299      | 742'872       | 240           | 3'082  |
| Sugar cane                     | Poales         | 1'800        | 2'801         | 0             | 2'801  |
| Onions (inc. shallots), green  | Asparagales    | 40'477       | 2'733         | 0             | 2'733  |
| Anise, badian, fennel, corian. | Apiales        | 66'093       | 93'594        | 40            | 2'283  |
| Kiwi fruit                     | Ericales       | 894'044      | 1'804         | 0             | 1'804  |
| Spinach                        | Caryophyllales | 55'447       | 5'088         | 2             | 1'696  |
| Cinnamon (canella)             | Laurales       | 25'959       | 1'549         | 0             | 1'549  |
| Chestnuts                      | Fagales        | 70'875       | 1'479         | 0             | 1'479  |
| Safflower seed                 | Asterales      | 6'988        | 1'249         | 0             | 1'249  |
| Arecanuts                      | Arecales       | 2'681        | 777           | 0             | 777    |
| Potatoes                       | Solanales      | 1'673'177    | 1'410         | 1             | 705    |
| Coffee Husks and Skins         | Gentianales    | 2'050        | 400           | 0             | 400    |
| Quinces                        | Rosales        | 9'748        | 399           | 0             | 399    |
| Jute                           | Malvales       | 9'373        | 8'040         | 24            | 322    |
| Eggplants (aubergines)         | Solanales      | 178'330      | 49'902        | 350           | 142    |
| Olives                         | Lamiales       | 19'354       | 136           | 0             | 136    |
| Sour cherries                  | Rosales        | 32'042       | 133           | 0             | 133    |
| Sugar beet                     | Caryophyllales | 19'006       | 76            | 0             | 76     |
| Okra                           | Malvales       | 183          | 70            | 1             | 35     |
| Gooseberries                   | Saxifragales   | 80           | 1             | 0             | 1      |
| Taro (cocoyam)                 | Alismatales    | 0            | 0             | 17            | 0      |
| Cassava                        | Malpighiales   | 0            | 0             | 11            | 0      |
| Persimmons                     | Ericales       | 0            | 0             | 1             | 0      |
| Ramie                          | Urticales      | 0            | 0             | 0             | 0      |
| Chillies and peppers, dry      | Solanales      | 192'687      | 0             | 0             | 0      |
| Pistachios                     | Sapindales     | 629'515      | 0             | 0             | 0      |
| Hops                           | Rosales        | 84'840       | 0             | 0             | 0      |
| Hempseed                       | Rosales        | 7'838        | 0             | 0             | 0      |
| Mixed grain                    | Poales         | 24'510       | 0             | 0             | 0      |
| Maize for forage and silage    | Poales         | 0            | 0             | 0             | 0      |
| Fonio                          | Poales         | 0            | 0             | 0             | 0      |
| Canary seed                    | Poales         | 30'241       | 0             | 0             | 0      |
| Cloves                         | Myrtales       | 11'815       | 0             | 0             | 0      |
| Kolanuts                       | Malvales       | 0            | 0             | 0             | 0      |
| Kapokseed in Shell             | Malvales       | 0            | 0             | 0             | 0      |
| Castor oil seed                | Malpighiales   | 564          | 0             | 0             | 0      |

| <b>Commodity</b>           | <b>Plant Order</b> | <b>Agr. Exports</b> | <b>#alien insect</b> |                      | <b>TVPI</b>    |
|----------------------------|--------------------|---------------------|----------------------|----------------------|----------------|
|                            |                    | <b>Europe, \$th</b> | <b>TV</b>            | <b>interceptions</b> | <b>\$th</b>    |
|                            |                    | <b>03-07</b>        | <b>\$th</b>          | <b>03-07</b>         |                |
| Nutmeg, mace and cardamoms | Magnoliales        | 70'261              | 0                    | 0                    | 0              |
| Peppermint                 | Lamiales           | 0                   | 0                    | 0                    | 0              |
| Vetches                    | Fabales            | 0                   | 0                    | 0                    | 0              |
| Lupins                     | Fabales            | 0                   | 0                    | 0                    | 0              |
| Cow peas, dry              | Fabales            | 0                   | 0                    | 0                    | 0              |
| Beans, dry                 | Fabales            | 311'644             | 0                    | 0                    | 0              |
| Bambara beans              | Fabales            | 0                   | 0                    | 0                    | 0              |
| Karite Nuts (Sheanuts)     | Ericales           | 0                   | 0                    | 0                    | 0              |
| Brazil nuts, with shell    | Ericales           | 4'227               | 0                    | 0                    | 0              |
| Yams                       | Dioscoreales       | 94                  | 0                    | 0                    | 0              |
| Melonseed                  | Cucurbitales       | 0                   | 0                    | 0                    | 0              |
| Quinoa                     | Caryophyllales     | 0                   | 0                    | 0                    | 0              |
| Buckwheat                  | Caryophyllales     | 10'385              | 0                    | 0                    | 0              |
| Mustard seed               | Brassicales        | 65'628              | 0                    | 0                    | 0              |
| Vanilla                    | Asparagales        | 96'690              | 0                    | 0                    | 0              |
| Sisal                      | Asparagales        | 19'610              | 0                    | 0                    | 0              |
| Agave Fibres Nes           | Asparagales        | 1                   | 0                    | 0                    | 0              |
| Yautia (cocoyam)           | Alismatales        | 3                   | 0                    | 0                    | 0              |
| <b>Agriculture Total</b>   |                    | <b>70'900'396</b>   | <b>170'157'879</b>   | <b>1'167</b>         | <b>145'683</b> |
