# Supplementary material for: Gaps in Border Controls Are Related to Quarantine Alien Insect Invasions in Europe
Source: PubMed Central journal article supplement (PMC3480426; doi:10.1371/journal.pone.0047689), 2012-10-24
Supplement: pone.0047689.s007.pdf [file pone.0047689.s007.pdf]

**Table S6.** Control of quarantine alien insects in Europe for the 5-year period 2003 to 2007. For each quarantine alien insect, data shown are; EU<sup>1</sup> if the species is listed in the EU Directive 2000/29/EC, EPPO<sup>2</sup> if the species is listed in the EPPO quarantine lists, the Trade Volume to be inspected (TV), the number of quarantine interceptions (EPPO), and the Trade Volume to be inspected Per Interception (TVPI) (ranked).

| Insect Species              | Family         | EU <sup>1</sup> | EPPO <sup>2</sup> | #alien insect |                        | TVPI<br>\$th     |
|-----------------------------|----------------|-----------------|-------------------|---------------|------------------------|------------------|
|                             |                |                 |                   | TV<br>\$th    | interceptions<br>03-07 |                  |
| Diabrotica barberi          | Chrysomelidae  | 1               | A1                | 7'619'950     | 0                      | <b>7'619'950</b> |
| Aleurocanthus woglumi       | Aleyrodidae    | 0               | A1                | 6'850'746     | 0                      | <b>6'850'746</b> |
| Maconellicoccus hirsutus    | Pseudococcidae | 0               | A1                | 5'706'971     | 0                      | <b>5'706'971</b> |
| Anastrepha fraterculus      | Tephritidae    | 1               | A1                | 5'689'580     | 0                      | <b>5'689'580</b> |
| Liriomyza trifolii          | Agromyzidae    | 0               | A2                | 5'677'971     | 0                      | <b>5'677'971</b> |
| Metamasius hemipterus       | Curculionidae  | 0               | A2                | 4'616'336     | 0                      | <b>4'616'336</b> |
| Helicoverpa zea             | Noctuidae      | 1               | A1                | 8'129'918     | 1                      | <b>4'064'959</b> |
| Rhynchophorus palmarum      | Curculionidae  | 0               | A1                | 3'726'549     | 0                      | <b>3'726'549</b> |
| Opogona sacchari            | Tineidae       | 0               | A2                | 3'535'994     | 0                      | <b>3'535'994</b> |
| Unaspis citri               | Diaspididae    | 0               | A1                | 3'221'669     | 0                      | <b>3'221'669</b> |
| Frankliniella occidentalis  | Thripidae      | 0               | A2                | 3'129'205     | 0                      | <b>3'129'205</b> |
| Spodoptera eridania         | Noctuidae      | 1               | A1                | 2'509'369     | 0                      | <b>2'509'369</b> |
| Spodoptera frugiperda       | Noctuidae      | 1               | A1                | 7'294'841     | 2                      | <b>2'431'614</b> |
| Tetranychus evansi          | Acari          | 0               | A2                | 2'327'549     | 0                      | <b>2'327'549</b> |
| Liriomyza sativae           | Agromyzidae    | 1               | A2                | 6'906'826     | 2                      | <b>2'302'275</b> |
| Pheletes californicus       | Elateridae     | 0               | A1                | 2'220'198     | 0                      | <b>2'220'198</b> |
| Cacoecimorpha pronubana     | Tortricidae    | 0               | A2                | 2'137'220     | 0                      | <b>2'137'220</b> |
| Anastrepha ludens           | Tephritidae    | 1               | A1                | 1'953'720     | 0                      | <b>1'953'720</b> |
| Carneiocephala fulgida      | Cicadellidae   | 1               | A1                | 1'910'399     | 0                      | <b>1'910'399</b> |
| Diabrotica virgifera        | Chrysomelidae  | 1               | A2                | 1'879'737     | 0                      | <b>1'879'737</b> |
| Epitrix similis             | Chrysomelidae  | 0               | A2                | 1'789'404     | 0                      | <b>1'789'404</b> |
| Quadraspidiotus perniciosus | Diaspididae    | 0               | A2                | 1'537'646     | 0                      | <b>1'537'646</b> |
| Ceratitidis capitata        | Tephritidae    | 0               | A2                | 9'119'303     | 5                      | <b>1'519'884</b> |
| Melanotus communis          | Elateridae     | 0               | A1                | 1'457'356     | 0                      | <b>1'457'356</b> |
| Diabrotica undecimpunctata  | Chrysomelidae  | 1               | A1                | 1'329'554     | 0                      | <b>1'329'554</b> |
| Halyomorpha halys           | Pentatomidae   | 0               | Alert             | 1'320'174     | 0                      | <b>1'320'174</b> |
| Aleurocanthus spiniferus    | Aleyrodidae    | 0               | A2                | 1'268'916     | 0                      | <b>1'268'916</b> |
| Popillia japonica           | Scarabaeidae   | 0               | A2                | 1'205'291     | 0                      | <b>1'205'291</b> |
| Naupactus leucoloma         | Curculionidae  | 1               | A1                | 1'183'302     | 0                      | <b>1'183'302</b> |
| Pterandrus rosa             | Tephritidae    | 1               | -                 | 1'172'808     | 0                      | <b>1'172'808</b> |
| Myndus crudus               | Cixiidae       | 1               | A1                | 1'148'477     | 0                      | <b>1'148'477</b> |
| Homalodisca coagulata       | Cicadellidae   | 0               | A1                | 1'068'154     | 0                      | <b>1'068'154</b> |
| Heteronychus arator         | Scarabaeidae   | 0               | A1                | 1'003'902     | 0                      | <b>1'003'902</b> |
| Listronotus bonariensis     | Curculionidae  | 0               | A1                | 998'412       | 0                      | <b>998'412</b>   |
| Rhagoletis pomonella        | Tephritidae    | 1               | A1                | 971'405       | 0                      | <b>971'405</b>   |
| Epitrix cucumeris           | Chrysomelidae  | 0               | A1                | 953'717       | 0                      | <b>953'717</b>   |
| Anthonomus grandis          | Curculionidae  | 0               | A1                | 933'135       | 0                      | <b>933'135</b>   |
| Scirtothrips aurantii       | Thripidae      | 0               | A1                | 837'561       | 0                      | <b>837'561</b>   |
| Toxoptera citricida         | Aphididae      | 0               | A2                | 835'846       | 0                      | <b>835'846</b>   |
| Eutetranychus orientalis    | Acari          | 0               | A2                | 825'316       | 0                      | <b>825'316</b>   |
| Tuta absoluta               | Gelechiidae    | 0               | A2                | 802'503       | 0                      | <b>802'503</b>   |
| Epitrix tuberis             | Chrysomelidae  | 0               | A1                | 787'382       | 0                      | <b>787'382</b>   |
| Anthonomus eugenii          | Curculionidae  | 0               | A1                | 753'683       | 0                      | <b>753'683</b>   |
| Spodoptera littoralis       | Noctuidae      | 0               | A2                | 5'175'787     | 6                      | <b>739'398</b>   |
| Trogoderma granarium        | Dermestidae    | 0               | A2                | 725'925       | 0                      | <b>725'925</b>   |
| Ceratitidis rosa            | Tephritidae    | 0               | A1                | 1'998'243     | 2                      | <b>666'081</b>   |
| Bactrocera invadens         | Tephritidae    | 0               | A1                | 634'114       | 0                      | <b>634'114</b>   |
| Blitopertha orientalis      | Scarabaeidae   | 0               | A1                | 583'983       | 0                      | <b>583'983</b>   |
| Viteus vitifoliae           | Phylloxeridae  | 0               | A2                | 580'340       | 0                      | <b>580'340</b>   |

| Insect Species             | Family         | EU <sup>1</sup> | EPPO <sup>2</sup> | #alien insect |                        | TVPI<br>\$th   |
|----------------------------|----------------|-----------------|-------------------|---------------|------------------------|----------------|
|                            |                |                 |                   | TV<br>\$th    | interceptions<br>03-07 |                |
| Pardalaspis quinaria       | Tephritidae    | 1               | -                 | 400'862       | 0                      | <b>400'862</b> |
| Trioxa erytrae             | Triozidae      | 0               | A1                | 399'453       | 0                      | <b>399'453</b> |
| Bactrocera tryoni          | Tephritidae    | 0               | A1                | 346'369       | 0                      | <b>346'369</b> |
| Bactrocera papayae         | Tephritidae    | 0               | A1                | 305'344       | 0                      | <b>305'344</b> |
| Spodoptera litura          | Noctuidae      | 1               | A1                | 2'331'671     | 9                      | <b>233'167</b> |
| Liriomyza huidobrensis     | Agromyzidae    | 0               | A2                | 4'447'251     | 19                     | <b>222'363</b> |
| Anastrepha obliqua         | Tephritidae    | 1               | A1                | 4'434'567     | 20                     | <b>211'170</b> |
| Bactrocera carambolae      | Tephritidae    | 0               | A1                | 203'772       | 0                      | <b>203'772</b> |
| Draeculacephala minerva    | Cicadellidae   | 1               | A1                | 186'143       | 0                      | <b>186'143</b> |
| Graphocephala atropunctata | Cicadellidae   | 1               | A1                | 177'222       | 0                      | <b>177'222</b> |
| Anastrepha suspensa        | Tephritidae    | 1               | A1                | 170'942       | 0                      | <b>170'942</b> |
| Diocalandra frumenti       | Curculionidae  | 0               | Alert             | 165'100       | 0                      | <b>165'100</b> |
| Dryocosmus kuriphilus      | Cynipidae      | 0               | A2                | 156'914       | 0                      | <b>156'914</b> |
| Rhagoletis suavis          | Tephritidae    | 1               | -                 | 156'425       | 0                      | <b>156'425</b> |
| Rhagoletis completa        | Tephritidae    | 1               | -                 | 156'425       | 0                      | <b>156'425</b> |
| Diaphorina citri           | Psyllidae      | 0               | A1                | 147'955       | 0                      | <b>147'955</b> |
| Scirtothrips citri         | Thripidae      | 0               | A1                | 143'000       | 0                      | <b>143'000</b> |
| Nemorimyza maculosa        | Agromyzidae    | 0               | A1                | 135'507       | 0                      | <b>135'507</b> |
| Amauromyza maculosa        | Agromyzidae    | 1               | -                 | 135'127       | 0                      | <b>135'127</b> |
| Conotrachelus nenuphar     | Curculionidae  | 1               | A1                | 120'864       | 0                      | <b>120'864</b> |
| Scirtothrips dorsalis      | Thripidae      | 0               | A2                | 1'201'239     | 9                      | <b>120'124</b> |
| Bemisia tabaci             | Aleyrodidae    | 1               | A2                | 12'666'466    | 120                    | <b>104'682</b> |
| Anomala orientalis         | Scarabaeidae   | 1               | -                 | 100'763       | 0                      | <b>100'763</b> |
| Cydia packardii            | Tortricidae    | 0               | A1                | 89'217        | 0                      | <b>89'217</b>  |
| Cydia prunivora            | Tortricidae    | 0               | A1                | 80'257        | 0                      | <b>80'257</b>  |
| Malacosoma americanum      | Lasiocampidae  | 0               | A1                | 73'912        | 0                      | <b>73'912</b>  |
| Rhizoecus hibisci          | Pseudococcidae | 0               | A1                | 73'486        | 0                      | <b>73'486</b>  |
| Choristoneura rosaceana    | Tortricidae    | 1               | A1                | 62'843        | 0                      | <b>62'843</b>  |
| Sternochetus mangiferae    | Curculionidae  | 0               | A1                | 52'157        | 0                      | <b>52'157</b>  |
| Bactrocera cucurbitae      | Tephritidae    | 0               | A1                | 272'497       | 6                      | <b>38'928</b>  |
| Rhynchophorus ferrugineus  | Curculionidae  | 0               | A2                | 66'510        | 1                      | <b>33'255</b>  |
| Bactrocera dorsalis        | Tephritidae    | 0               | A1                | 1'094'568     | 35                     | <b>30'405</b>  |
| Bactrocera dorsalis        | Tephritidae    | 0               | A1                | 1'094'568     | 35                     | <b>30'405</b>  |
| Diaphania indica           | Crambidae      | 0               | A2                | 1'612'798     | 59                     | <b>26'880</b>  |
| Anthonomus signatus        | Curculionidae  | 0               | A1                | 24'990        | 0                      | <b>24'990</b>  |
| Rhagoletis cingulata       | Tephritidae    | 1               | A2                | 22'005        | 0                      | <b>22'005</b>  |
| Rhagoletis indifferens     | Tephritidae    | 1               | A1                | 21'976        | 0                      | <b>21'976</b>  |
| Rhagoletis fausta          | Tephritidae    | 1               | A1                | 21'976        | 0                      | <b>21'976</b>  |
| Leptinotarsa decemlineata  | Chrysomelidae  | 0               | A2                | 16'273        | 0                      | <b>16'273</b>  |
| Thrips palmi               | Thripidae      | 1               | A1                | 4'318'734     | 373                    | <b>11'547</b>  |
| Helicoverpa armigera       | Noctuidae      | 0               | A2                | 3'113'574     | 275                    | <b>11'281</b>  |
| Bactrocera pyrifoliae      | Tephritidae    | 0               | A1                | 9'543         | 0                      | <b>9'543</b>   |
| Rhagoletis mendax          | Tephritidae    | 1               | A1                | 8'474         | 0                      | <b>8'474</b>   |
| Bactrocera caryae          | Tephritidae    | 0               | A1                | 5'000         | 0                      | <b>5'000</b>   |
| Dacus ciliatus             | Tephritidae    | 1               | A1                | 26'146        | 8                      | <b>2'905</b>   |
| Bactrocera zonata          | Tephritidae    | 0               | A1                | 102'626       | 49                     | <b>2'053</b>   |
| Bactrocera occipitalis     | Tephritidae    | 0               | A1                | 1'920         | 0                      | <b>1'920</b>   |
| Bactrocera philippinensis  | Tephritidae    | 0               | A1                | 1'767         | 0                      | <b>1'767</b>   |
| Bactrocera kandiensis      | Tephritidae    | 0               | A1                | 1'341         | 0                      | <b>1'341</b>   |
| Erschoviella musculana     | Noctuidae      | 0               | A2                | 902           | 0                      | <b>902</b>     |
| Carposina sasakii          | Carposinidae   | 0               | A2                | 594           | 0                      | <b>594</b>     |
| Leucinodes orbonalis       | Pyalidae       | 0               | Alert             | 79'912        | 135                    | <b>588</b>     |
| Paysandisia archon         | Castniidae     | 0               | A2                | 454           | 0                      | <b>454</b>     |
| Numonia pyrivorella        | Geometridae    | 0               | A2                | 414           | 0                      | <b>414</b>     |
| Lymantria mathura          | Lymantriidae   | 0               | A2                | 241           | 0                      | <b>241</b>     |
| Pardalaspis cyanescens     | Tephritidae    | 1               | -                 | 218           | 0                      | <b>218</b>     |
| Anthonomus bisignifer      | Curculionidae  | 0               | A1                | 123           | 0                      | <b>123</b>     |

| Insect Species                   | Family        | EU <sup>1</sup> | EPPO <sup>2</sup> | #alien insect interceptions |       | TVPI<br>\$th |
|----------------------------------|---------------|-----------------|-------------------|-----------------------------|-------|--------------|
|                                  |               |                 |                   | TV<br>\$th                  | 03-07 |              |
| Bactrocera tsuneonis             | Tephritidae   | 0               | A1                | 89                          | 0     | <b>89</b>    |
| Tecia solanivora                 | Gelechiidae   | 0               | A2                | 38                          | 0     | <b>38</b>    |
| Cydia inopinata                  | Tortricidae   | 0               | A2                | 34                          | 0     | <b>34</b>    |
| Premnotrypes vorax               | Curculionidae | 1               | A1                | 16                          | 0     | <b>16</b>    |
| Premnotrypes suturicallus        | Curculionidae | 1               | A1                | 16                          | 0     | <b>16</b>    |
| Premnotrypes latithorax          | Curculionidae | 1               | A1                | 16                          | 0     | <b>16</b>    |
| Bactrocera minax                 | Tephritidae   | 0               | A1                | 13                          | 0     | <b>13</b>    |
| Bactrocera cucumis               | Tephritidae   | 0               | A1                | 10                          | 0     | <b>10</b>    |
| Rhagoletis ribicola              | Tephritidae   | 1               | -                 | 0                           | 0     | <b>0</b>     |
| Epochra canadensis               | Tephritidae   | 1               | -                 | 0                           | 0     | <b>0</b>     |
| Cryptophlebia leucotreta         | Tortricidae   | 0               | A2                | 0                           | 32    | <b>0</b>     |
| Xylosandrus crassiusculus        | Scolytidae    | 0               | Alert             | 0                           | 0     | <b>0</b>     |
| Ips subelongatus                 | Scolytidae    | 0               | A2                | 0                           | 0     | <b>0</b>     |
| Monoctonus galloprovincialis     | Cerambycidae  | 1               | -                 | 0                           | 0     | <b>0</b>     |
| Tetropium gracilicorne           | Cerambycidae  | 0               | A2                | 0                           | 0     | <b>0</b>     |
| Monoctonus urussovii             | Cerambycidae  | 1               | -                 | 0                           | 0     | <b>0</b>     |
| Monoctonus saltuarius            | Cerambycidae  | 1               | A1                | 0                           | 0     | <b>0</b>     |
| Xylotrechus altaicus             | Cerambycidae  | 0               | A2                | 0                           | 0     | <b>0</b>     |
| Scolytus morawitzi               | Scolytidae    | 0               | A2                | 0                           | 0     | <b>0</b>     |
| Ips hauseri                      | Scolytidae    | 0               | A2                | 0                           | 0     | <b>0</b>     |
| Sirex ermak                      | Siricidae     | 0               | A2                | 0                           | 0     | <b>0</b>     |
| Monoctonus sutor                 | Cerambycidae  | 1               | A1                | 0                           | 0     | <b>0</b>     |
| Agrilus planipennis              | Buprestidae   | 0               | A2                | 0                           | 0     | <b>0</b>     |
| Anoplophora chinensis            | Cerambycidae  | 1               | A2                | 0                           | 0     | <b>0</b>     |
| Arrhenodes minutus               | Curculionidae | 1               | A1                | 0                           | 0     | <b>0</b>     |
| Saperda candida                  | Cerambycidae  | 0               | A1                | 0                           | 0     | <b>0</b>     |
| Enaphalodes rufulus              | Cerambycidae  | 0               | Alert             | 0                           | 0     | <b>0</b>     |
| Agrilus anxius                   | Buprestidae   | 0               | Alert             | 0                           | 0     | <b>0</b>     |
| Pseudopityophthorus minutissimus | Scolytidae    | 1               | A1                | 0                           | 0     | <b>0</b>     |
| Anoplophora glabripennis         | Cerambycidae  | 1               | A1                | 0                           | 0     | <b>0</b>     |
| Lopholeucaspis japonica          | Diaspididae   | 0               | A2                | 0                           | 0     | <b>0</b>     |
| Dendrolimus sibiricus            | Lasiocampidae | 0               | A2                | 0                           | 0     | <b>0</b>     |
| Hesperophanes campestris         | Cerambycidae  | 0               | A2                | 0                           | 0     | <b>0</b>     |
| Megaplatypus mutatus             | Platygodidae  | 0               | A2                | 0                           | 0     | <b>0</b>     |
| Malacosoma paralella             | Lasiocampidae | 0               | A2                | 0                           | 0     | <b>0</b>     |
| Lepidosaphes ussuriensis         | Diaspididae   | 0               | A2                | 0                           | 0     | <b>0</b>     |
| Ips calligraphus                 | Scolytidae    | 0               | A1                | 0                           | 0     | <b>0</b>     |
| Monoctonus scutellatus           | Cerambycidae  | 1               | A1                | 0                           | 0     | <b>0</b>     |
| Monoctonus carolinensis          | Cerambycidae  | 1               | A1                | 0                           | 0     | <b>0</b>     |
| Ips pini                         | Scolytidae    | 0               | A1                | 0                           | 0     | <b>0</b>     |
| Gnathotrichus sulcatus           | Scolytidae    | 0               | A1                | 0                           | 0     | <b>0</b>     |
| Dendroctonus rufipennis          | Scolytidae    | 0               | A1                | 0                           | 0     | <b>0</b>     |
| Dendroctonus pseudotsugae        | Scolytidae    | 0               | A1                | 0                           | 0     | <b>0</b>     |
| Dendroctonus ponderosae          | Scolytidae    | 0               | A1                | 0                           | 0     | <b>0</b>     |
| Dendroctonus brevicornis         | Scolytidae    | 0               | A1                | 0                           | 0     | <b>0</b>     |
| Ips grandicollis                 | Scolytidae    | 0               | A1                | 0                           | 0     | <b>0</b>     |
| Monoctonus titillator            | Cerambycidae  | 1               | A1                | 0                           | 0     | <b>0</b>     |
| Monoctonus obtusus               | Cerambycidae  | 1               | A1                | 0                           | 0     | <b>0</b>     |
| Monoctonus notatus               | Cerambycidae  | 1               | A1                | 0                           | 0     | <b>0</b>     |
| Monoctonus mutator               | Cerambycidae  | 1               | A1                | 0                           | 0     | <b>0</b>     |
| Monoctonus marmorator            | Cerambycidae  | 1               | A1                | 0                           | 0     | <b>0</b>     |
| Monoctonus clamator              | Cerambycidae  | 1               | -                 | 0                           | 0     | <b>0</b>     |
| Ips plastographus                | Scolytidae    | 0               | A1                | 0                           | 0     | <b>0</b>     |
| Dryocoetes confusus              | Scolytidae    | 0               | A1                | 0                           | 0     | <b>0</b>     |
| Malacosoma disstria              | Lasiocampidae | 0               | A1                | 0                           | 0     | <b>0</b>     |
| Scaphoideus luteolus             | Cicadellidae  | 1               | A1                | 0                           | 0     | <b>0</b>     |
| Choristoneura conflictana        | Tortricidae   | 1               | A1                | 0                           | 0     | <b>0</b>     |

| Insect Species             | Family        | EU <sup>1</sup> | EPP0 <sup>2</sup> | #alien insect      |                     | TVPI           |
|----------------------------|---------------|-----------------|-------------------|--------------------|---------------------|----------------|
|                            |               |                 |                   | TV \$th            | interceptions 03-07 |                |
| Ips lecontei               | Scolytidae    | 0               | A1                | 0                  | 0                   | 0              |
| Dendroctonus frontalis     | Scolytidae    | 0               | A1                | 0                  | 0                   | 0              |
| Monochamus rubigenus       | Cerambycidae  | 1               | -                 | 0                  | 0                   | 0              |
| Dendroctonus adjunctus     | Scolytidae    | 0               | A1                | 0                  | 0                   | 0              |
| Ips confusus               | Scolytidae    | 0               | A1                | 0                  | 0                   | 0              |
| Ips paraconfusus           | Scolytidae    | 0               | A1                | 0                  | 0                   | 0              |
| Pissodes nemorensis        | Curculionidae | 0               | A1                | 0                  | 0                   | 0              |
| Pissodes terminalis        | Curculionidae | 0               | A1                | 0                  | 0                   | 0              |
| Pissodes strobi            | Curculionidae | 0               | A1                | 0                  | 0                   | 0              |
| Orgyia pseudotsugata       | Lymantriidae  | 0               | A1                | 0                  | 0                   | 0              |
| Choristoneura occidentalis | Tortricidae   | 1               | A1                | 0                  | 0                   | 0              |
| Choristoneura fumiferana   | Tortricidae   | 1               | A1                | 0                  | 0                   | 0              |
| Oligonychus perditus       | Acari         | 0               | A1                | 0                  | 0                   | 0              |
| Aeolesthes sarta           | Cerambycidae  | 0               | A2                | 0                  | 0                   | 0              |
| Anoplophora malasiaca      | Cerambycidae  | 1               | -                 | 0                  | 0                   | 0              |
| Psacotheta hilaris         | Cerambycidae  | 0               | Alert             | 0                  | 0                   | 0              |
| Xylotrechus namanganensis  | Cerambycidae  | 0               | A2                | 0                  | 0                   | 0              |
| Monochamus alternatus      | Cerambycidae  | 1               | A1                | 0                  | 0                   | 0              |
| Chrysophtharta bimaculata  | Chrysomelidae | 0               | Alert             | 0                  | 0                   | 0              |
| Monochamus tesseraula      | Cerambycidae  | 1               | -                 | 0                  | 0                   | 0              |
| Monochamus nitens          | Cerambycidae  | 1               | A1                | 0                  | 0                   | 0              |
| Drosophila suzukii         | Drosophilidae | 0               | Alert             | 0                  | 0                   | 0              |
| Diaphania perspectalis     | Pyralidae     | 0               | Alert             | 0                  | 0                   | 0              |
| Strobilomyia viaria        | Anthomyidae   | 0               | A2                | 0                  | 0                   | 0              |
| Rhacochlaena japonica      | Tephritidae   | 1               | -                 | 0                  | 0                   | 0              |
| Monochamus sartor          | Cerambycidae  | 1               | -                 | 0                  | 0                   | 0              |
| Margarodes vredendalensis  | Margarodidae  | 0               | A1                | 0                  | 0                   | 0              |
| Margarodes vitis           | Margarodidae  | 0               | A1                | 0                  | 0                   | 0              |
| Margarodes prieskaensis    | Margarodidae  | 0               | A1                | 0                  | 0                   | 0              |
| Gonipterus scutellatus     | Curculionidae | 0               | A2                | 0                  | 0                   | 0              |
| Gonipterus gibberus        | Curculionidae | 0               | A1                | 0                  | 0                   | 0              |
| Diabrotica speciosa        | Chrysomelidae | 0               | A1                | 0                  | 0                   | 0              |
| Dendrolimus superans       | Lasiocampidae | 0               | A2                | 0                  | 0                   | 0              |
| Cacyreus marshalli         | Lycaenidae    | 0               | A2                | 0                  | 0                   | 0              |
| Aculops fuchsiae           | Acari         | 0               | A2                | 0                  | 0                   | 0              |
| Acleris variana            | Tortricidae   | 1               | A1                | 0                  | 0                   | 0              |
| Acleris gloverana          | Tortricidae   | 1               | A1                | 0                  | 0                   | 0              |
| <b>World Total</b>         |               |                 |                   | <b>170'157'879</b> | <b>1203</b>         | <b>141'327</b> |
