# Supplementary material for: Gaps in Border Controls Are Related to Quarantine Alien Insect Invasions in Europe
Source: PubMed Central journal article supplement (PMC3480426; doi:10.1371/journal.pone.0047689), 2012-10-24
Supplement: pone.0047689.s008.pdf [file pone.0047689.s008.pdf]

**Table S7.** European country insect invasions data for the 5-year period 2003 to 2007. For each European country, data shown are; the total value of agricultural imports (US\$th, FAO), the Trade Volume to be inspected (TV), the number of quarantine alien insect interceptions (EPPO), the Trade Volume to be inspected Per Interception (TVPI) (ranked), the number of quarantine listed alien insects that have established (DAISIE, EPPO), the Nominal GDP (\$, IMF), Agriculture as a % of GDP, Capital city latitude (degrees), Country area (km<sup>2</sup>) and altitudinal range (m)

| Country       | Agricultural imports, \$th | TV \$th            | #aliens int. 03-07 | TVPI \$th        | #alien insects Establ. | Nominal GDP, \$ 03-07 | Agr. as % GDP | (Deg.) Capital Latitude | (km <sup>2</sup> ) Country Area | (m) Altitude Range |
|---------------|----------------------------|--------------------|--------------------|------------------|------------------------|-----------------------|---------------|-------------------------|---------------------------------|--------------------|
| Portugal      | 1'729'004                  | 5'609'972          | 0                  | <b>5'609'972</b> | 25                     | 18'450'666            | 2.9%          | 38.5                    | 92'090                          | 2'351              |
| Switzerland   | 1'619'704                  | 3'337'449          | 0                  | <b>3'337'449</b> | 20                     | 50'650'884            | 1.5%          | 46.6                    | 41'285                          | 4'439              |
| Italy         | 5'953'086                  | 15'373'298         | 4                  | <b>3'074'660</b> | 33                     | 31'000'044            | 2.1%          | 41.5                    | 301'338                         | 4'813              |
| Greece        | 1'158'012                  | 2'930'451          | 0                  | <b>2'930'451</b> | 15                     | 22'475'547            | 3.4%          | 38.0                    | 131'990                         | 2'919              |
| Belgium       | 6'529'745                  | 16'795'978         | 5                  | <b>2'799'330</b> | 7                      | 36'273'866            | 0.8%          | 50.5                    | 30'528                          | 694                |
| Poland        | 1'577'412                  | 1'852'699          | 0                  | <b>1'852'699</b> | 12                     | 8'076'329             | 4.6%          | 52.1                    | 312'685                         | 2'501              |
| Romania       | 622'093                    | 1'536'906          | 0                  | <b>1'536'906</b> | 13                     | 4'885'133             | 12.4%         | 44.3                    | 238'391                         | 2'544              |
| Finland       | 647'598                    | 932'001            | 0                  | <b>932'001</b>   | 5                      | 38'159'573            | 3.4%          | 60.1                    | 338'424                         | 1'324              |
| Austria       | 1'506'736                  | 769'602            | 0                  | <b>769'602</b>   | 10                     | 37'472'092            | 1.7%          | 48.1                    | 83'855                          | 3'683              |
| Spain         | 5'642'107                  | 21'398'899         | 33                 | <b>629'379</b>   | 26                     | 26'592'362            | 3.4%          | 40.3                    | 504'030                         | 3'718              |
| Germany       | 14'227'833                 | 25'101'581         | 54                 | <b>456'392</b>   | 16                     | 34'613'903            | 0.9%          | 52.3                    | 357'021                         | 2'966              |
| Bulgaria      | 195'101                    | 455'705            | 0                  | <b>455'705</b>   | 14                     | 3'736'748             | 7.5%          | 42.4                    | 110'994                         | 2'925              |
| Slovenia      | 287'107                    | 444'514            | 0                  | <b>444'514</b>   | 14                     | 18'463'539            | 2.3%          | 46.0                    | 20'273                          | 2'864              |
| Hungary       | 399'209                    | 426'160            | 0                  | <b>426'160</b>   | 14                     | 10'855'061            | 3.4%          | 47.3                    | 93'030                          | 938                |
| Lithuania     | 284'954                    | 421'317            | 0                  | <b>421'317</b>   | 6                      | 8'000'747             | 5.3%          | 54.4                    | 65'200                          | 295                |
| Sweden        | 1'427'967                  | 1'832'266          | 5                  | <b>305'378</b>   | 4                      | 42'163'735            | 1.6%          | 58.0                    | 449'964                         | 2'106              |
| Cyprus        | 141'527                    | 279'652            | 0                  | <b>279'652</b>   | 10                     | 23'013'406            | 2.1%          | 35.1                    | 9'248                           | 1'951              |
| Czech Rep.    | 850'671                    | 799'404            | 2                  | <b>266'468</b>   | 13                     | 12'533'234            | 2.8%          | 50.1                    | 78'866                          | 1'487              |
| Denmark       | 1'183'889                  | 1'735'284          | 8                  | <b>192'809</b>   | 8                      | 48'009'845            | 4.6%          | 55.4                    | 43'075                          | 178                |
| Malta         | 62'099                     | 163'902            | 0                  | <b>163'902</b>   | 12                     | 15'141'846            | 1.7%          | 35.5                    | 316                             | 253                |
| Slovakia      | 347'003                    | 127'350            | 0                  | <b>127'350</b>   | 9                      | 9'447'673             | 7.8%          | 48.1                    | 49'035                          | 2'561              |
| France        | 6'327'177                  | 11'947'523         | 94                 | <b>125'763</b>   | 24                     | 35'550'725            | 2.1%          | 48.5                    | 674'843                         | 4'812              |
| Estonia       | 119'997                    | 106'593            | 0                  | <b>106'593</b>   | 5                      | 11'028'602            | 3.0%          | 59.3                    | 45'228                          | 318                |
| Latvia        | 162'049                    | 65'859             | 0                  | <b>65'859</b>    | 5                      | 7'799'890             | 3.6%          | 56.6                    | 64'589                          | 312                |
| UK            | 8'120'193                  | 22'136'632         | 366                | <b>60'318</b>    | 10                     | 38'502'636            | 1.2%          | 51.3                    | 243'610                         | 1'348              |
| Netherlands   | 8'866'520                  | 32'937'855         | 602                | <b>54'623</b>    | 10                     | 39'854'964            | 1.9%          | 52.2                    | 41'848                          | 884                |
| Luxembourg    | 233'383                    | 39'624             | 0                  | <b>39'624</b>    | 6                      | 83'596'662            | 0.4%          | 49.4                    | 2'586                           | 427                |
| Ireland       | 678'221                    | 599'405            | 30                 | <b>19'336</b>    | 3                      | 49'387'888            | 5.0%          | 53.2                    | 84'421                          | 1'038              |
| <b>Europe</b> | <b>70'900'396</b>          | <b>170'157'879</b> | <b>1'203</b>       | <b>141'327</b>   |                        |                       |               |                         |                                 |                    |
