# Supplementary material for: Gaps in Border Controls Are Related to Quarantine Alien Insect Invasions in Europe
Source: PLoS One. 2012 Oct 24;7(10):e47689. doi: 10.1371/journal.pone.0047689 (PMC3480426; doi:10.1371/journal.pone.0047689)
Supplement: Table S1 — Insect species matrix origin-commodity. Country-level distribution range and host-plant associations (FAO commodities) for all 200 quarantine listed insect species in Europe. (XLSX) [file pone.0047689.s002.xlsx]

## Sheet: Species_Matrix
Table S1: Insect species matrix origin-commodity
			Insect Distribution Range
			Afghanistan	Albania	Algeria	American Samoa	Angola	Antigua and Barbuda	Argentina	Armenia	Aruba	Australia	Austria	Azerbaijan	Bahamas	Bahrain	Bangladesh	Barbados	Belarus	Belgium	Belize	Benin	Bermuda	Bhutan	Bolivia (Plurinational State of)	Bosnia and Herzegovina	Botswana	Brazil	British Virgin Islands	Brunei Darussalam	Bulgaria	Burkina Faso	Burundi	Cambodia	Cameroon	Canada	Cape Verde	Chad	Cayman Islands	Central African Republic	Chile	China, Hong Kong SAR	China, Macao SAR	Colombia	Comoros	Congo	Cook Islands	Costa Rica	Côte d'Ivoire
Species	Family	Order	Asia	Europe	Africa	Oceania	Africa	SC America	SC America	Europe	SC America	Oceania	Europe	Europe	SC America	Asia	Asia	SC America	Europe	Europe	SC America	Africa	North America	Asia	SC America	Europe	Africa	SC America	SC America	Asia	Europe	Africa	Africa	Asia	Africa	North America	Africa	Africa	SC America	Africa	SC America	Asia	Asia	SC America	Africa	Africa	Oceania	SC America	Africa
Bemisia tabaci	Aleyrodidae	Hemiptera	1		1		1	1	1			1		1				1			1		1	1				1				1			1	1	1	1		1		1		1				1	1
Helicoverpa armigera	Noctuidae	Lepidoptera	1	1	1		1			1		1		1			1					1		1			1				1	1	1	1	1		1	1		1		1				1			1
Thrips palmi	Thripidae	Thysanoptera						1				1					1	1										1		1												1
Spodoptera littoralis	Noctuidae	Lepidoptera			1		1									1						1					1					1	1		1		1			1
Liriomyza huidobrensis	Agromyzidae	Diptera							1				1							1	1							1													1			1				1
Liriomyza trifolii	Agromyzidae	Diptera							1				1		1			1		1		1	1					1								1					1	1		1				1	1
Bactrocera dorsalis	Tephritidae	Diptera															1							1										1								1
Leucinodes orbonalis	Pyralidae	Lepidoptera															1													1			1	1	1							1				1
Liriomyza sativae	Agromyzidae	Diptera						1	1						1			1										1							1						1			1			1	1
Rhynchophorus ferrugineus	Curculionidae	Coleoptera		1								1				1	1																	1								1
Bactrocera zonata	Tephritidae	Diptera															1
Diaphania indica	Crambidae	Lepidoptera					1										1					1					1			1		1	1	1	1		1	1		1		1			1	1			1
Cryptophlebia leucotreta	Tortricidae	Lepidoptera
Spodoptera litura	Noctuidae	Lepidoptera	1									1					1													1				1								1					1
Opogona sacchari	Tineidae	Lepidoptera					1	1			1				1			1			1	1	1				1	1	1			1	1		1		1	1	1	1				1	1	1		1	1
Anoplophora chinensis	Cerambycidae	Coleoptera																																								1	1
Leptinotarsa decemlineata	Chrysomelidae	Coleoptera								1			1	1					1	1											1					1												1
Anastrepha obliqua	Tephritidae	Diptera							1						1						1		1					1																1				1
Bactrocera cucurbitae	Tephritidae	Diptera	1														1													1				1								1
Scirtothrips dorsalis	Thripidae	Thysanoptera										1					1													1												1
Rhizoecus hibisci	Pseudococcidae	Hemiptera																												1				1								1
Bactrocera invadens	Tephritidae	Diptera					1															1		1								1			1			1							1	1			1
Anoplophora glabripennis	Cerambycidae	Coleoptera																																								1	1
Dacus ciliatus	Tephritidae	Diptera					1										1					1					1								1			1
Monochamus alternatus	Cerambycidae	Coleoptera																																								1	1
Viteus vitifoliae	Phylloxeridae	Hemiptera			1				1	1		1	1	1									1		1	1		1								1						1		1
Aleurocanthus woglumi	Aleyrodidae	Hemiptera													1		1	1			1		1	1										1					1			1		1				1
Bactrocera kandiensis	Tephritidae	Diptera
Frankliniella occidentalis	Thripidae	Thysanoptera							1			1	1							1											1					1								1				1
Helicoverpa zea	Noctuidae	Lepidoptera						1	1						1			1					1		1			1								1					1			1				1
Sternochetus mangiferae	Curculionidae	Coleoptera										1					1	1						1																1		1
Acleris gloverana	Tortricidae	Lepidoptera																																		1
Acleris variana	Tortricidae	Lepidoptera																																		1
Aculops fuchsiae	Acari	Acari																										1
Aeolesthes sarta	Cerambycidae	Coleoptera	1
Agrilus planipennis	Buprestidae	Coleoptera																																		1						1
Aleurocanthus spiniferus	Aleyrodidae	Hemiptera										1					1							1						1				1								1
Amauromyza maculosa	Agromyzidae	Diptera							1						1			1										1											1									1
Anastrepha fraterculus	Tephritidae	Diptera							1																1			1													1			1				1
Anastrepha ludens	Tephritidae	Diptera							1												1																							1				1
Anastrepha suspensa	Tephritidae	Diptera													1
Anomala orientalis	Scarabaeidae	Coleoptera																																								1
Anoplophora malasiaca	Cerambycidae	Coleoptera
Anthonomus bisignifer	Curculionidae	Coleoptera
Anthonomus eugenii	Curculionidae	Coleoptera
Anthonomus grandis	Curculionidae	Coleoptera							1												1																							1				1
Anthonomus signatus	Curculionidae	Coleoptera																																		1
Arrhenodes minutus	Curculionidae	Coleoptera																																		1
Bactrocera cucumis	Tephritidae	Diptera										1
Bactrocera carambolae	Tephritidae	Diptera																												1
Bactrocera caryae	Tephritidae	Diptera
Bactrocera occipitalis	Tephritidae	Diptera																												1
Bactrocera papayae	Tephritidae	Diptera										1																		1
Bactrocera philippinensis	Tephritidae	Diptera
Bactrocera pyrifoliae	Tephritidae	Diptera
Bactrocera minax	Tephritidae	Diptera																						1																		1
Bactrocera tryoni	Tephritidae	Diptera										1
Bactrocera tsuneonis	Tephritidae	Diptera																																								1
Blitopertha orientalis	Scarabaeidae	Coleoptera																																								1
Cacoecimorpha pronubana	Tortricidae	Lepidoptera		1	1
Cacyreus marshalli	Lycaenidae	Lepidoptera																		1
Carneocephala fulgida	Cicadellidae	Hemiptera							1																			1																				1
Carposina sasakii	Carposinidae	Lepidoptera																																								1
Ceratitis capitata	Tephritidae	Diptera	1	1	1		1		1			1										1			1		1	1				1	1		1		1							1		1		1	1
Ceratitis rosa	Tephritidae	Diptera					1
Choristoneura conflictana	Tortricidae	Lepidoptera																																		1
Choristoneura fumiferana	Tortricidae	Lepidoptera																																		1
Choristoneura occidentalis	Tortricidae	Lepidoptera																																		1
Choristoneura rosaceana	Tortricidae	Lepidoptera																																		1
Conotrachelus nenuphar	Curculionidae	Coleoptera																																		1
Cydia inopinata	Tortricidae	Lepidoptera																																								1
Cydia packardi	Tortricidae	Lepidoptera																																		1
Cydia prunivora	Tortricidae	Lepidoptera																																		1
Dacus dorsalis	Tephritidae	Diptera															1							1										1								1
Dendroctonus adjunctus	Scolytidae	Coleoptera
Dendroctonus brevicomis	Scolytidae	Coleoptera																																		1
Dendroctonus frontalis	Scolytidae	Coleoptera																			1
Dendroctonus ponderosae	Scolytidae	Coleoptera																																		1
Dendroctonus pseudotsugae	Scolytidae	Coleoptera																																		1
Dendroctonus rufipennis	Scolytidae	Coleoptera																																		1
Dendrolimus sibiricus	Lasiocampidae	Lepidoptera																																								1
Dendrolimus superans	Lasiocampidae	Lepidoptera
Diabrotica barberi	Chrysomelidae	Coleoptera																																		1
Diabrotica speciosa	Chrysomelidae	Coleoptera							1																1			1																1				1
Diabrotica undecimpunctata	Chrysomelidae	Coleoptera																																		1
Diabrotica virgifera	Chrysomelidae	Coleoptera
Diaphorina citri	Psyllidae	Hemiptera	1														1											1						1								1
Draeculacephala minerva	Cicadellidae	Hemiptera							1																			1																				1
Dryocoetes confusus	Scolytidae	Coleoptera																																		1
Dryocosmus kuriphilus	Cynipidae	Hymenoptera																																								1
Epitrix cucumeris	Chrysomelidae	Coleoptera																																		1
Epitrix tuberis	Chrysomelidae	Coleoptera																																		1
Epochra canadensis	Tephritidae	Diptera																																		1
Erschoviella musculana	Noctuidae	Lepidoptera	1
Eutetranychus orientalis	Acari	Acari	1									1					1																				1					1
Gnathotrichus sulcatus	Scolytidae	Coleoptera																																		1
Gonipterus gibberus	Curculionidae	Coleoptera							1			1																1
Gonipterus scutellatus	Curculionidae	Coleoptera							1			1																1													1	1
Graphocephala atropunctata	Cicadellidae	Hemiptera							1																			1																				1
Hesperophanes campestris	Cerambycidae	Coleoptera								1																																1
Heteronychus arator	Scarabaeidae	Coleoptera					1					1															1	1																	1	1
Homalodisca coagulata	Cicadellidae	Hemiptera
Ips calligraphus	Scolytidae	Coleoptera																																		1
Ips confusus	Scolytidae	Coleoptera
Ips grandicollis	Scolytidae	Coleoptera																																		1
Ips hauseri	Scolytidae	Coleoptera
Ips lecontei	Scolytidae	Coleoptera																			1
Ips paraconfusus	Scolytidae	Coleoptera
Ips pini	Scolytidae	Coleoptera																																		1
Ips plastographus	Scolytidae	Coleoptera																																		1
Ips subelongatus	Scolytidae	Coleoptera																																								1
Lepidosaphes ussuriensis	Diaspididae	Hemiptera																																								1
Listronotus bonariensis	Curculionidae	Coleoptera							1			1													1			1													1
Lopholeucaspis japonica	Diaspididae	Hemiptera												1														1														1
Lymantria mathura	Lymantriidae	Lepidoptera																																								1
Maconellicoccus hirsutus	Pseudococcidae	Hemiptera						1				1			1		1	1			1	1							1	1		1		1	1			1		1		1				1			1
Malacosoma americanum	Lasiocampidae	Lepidoptera																																		1
Malacosoma disstria	Lasiocampidae	Lepidoptera																																		1
Malacosoma paralella	Lasiocampidae	Lepidoptera								1
Margarodes prieskaensis	Margarodidae	Hemiptera
Margarodes vitis	Margarodidae	Hemiptera							1																			1													1
Margarodes vredendalensis	Margarodidae	Hemiptera
Megaplatypus mutatus	Platypodidae	Coleoptera							1																1			1
Melanotus communis	Elateridae	Coleoptera
Metamasius hemipterus	Curculionidae	Coleoptera						1	1									1			1				1			1							1									1		1		1
Monochamus carolinensis	Cerambycidae	Coleoptera																																		1
Monochamus clamator	Cerambycidae	Coleoptera																																		1
Monochamus galloprovincialis	Cerambycidae	Coleoptera			1
Monochamus marmorator	Cerambycidae	Coleoptera																																		1
Monochamus mutator	Cerambycidae	Coleoptera																																		1
Monochamus nitens	Cerambycidae	Coleoptera
Monochamus notatus	Cerambycidae	Coleoptera																																		1
Monochamus obtusus	Cerambycidae	Coleoptera																																		1
Monochamus rubigeneus	Cerambycidae	Coleoptera
Monochamus saltuarius	Cerambycidae	Coleoptera											1																		1											1
Monochamus sartor	Cerambycidae	Coleoptera											1																		1
Monochamus scutellatus	Cerambycidae	Coleoptera																																		1
Monochamus sutor	Cerambycidae	Coleoptera											1																		1											1
Monochamus tesserula	Cerambycidae	Coleoptera																																								1
Monochamus titillator	Cerambycidae	Coleoptera																																		1
Monochamus urussovii	Cerambycidae	Coleoptera																																								1
Myndus crudus	Cixiidae	Hemiptera																																					1									1
Naupactus leucoloma	Curculionidae	Coleoptera							1																																1
Nemorimyza maculosa	Agromyzidae	Diptera							1						1			1										1											1									1
Numonia pyrivorella	Geometridae	Lepidoptera																																								1
Oligonychus perditus	Acari	Acari																																								1
Orgyia pseudotsugata	Lymantriidae	Lepidoptera																																		1
Pardalaspis cyanescens	Tephritidae	Diptera																																											1
Pardalaspis quinaria	Tephritidae	Diptera																									1
Paysandisia archon	Castniidae	Lepidoptera							1																			1
Pheletes californicus	Elateridae	Coleoptera																																		1
Pissodes nemorensis	Curculionidae	Coleoptera																																		1
Pissodes strobi	Curculionidae	Coleoptera																																		1
Pissodes terminalis	Curculionidae	Coleoptera																																		1
Popillia japonica	Scarabaeidae	Coleoptera																																		1						1
Premnotrypes latithorax	Curculionidae	Coleoptera							1																1			1													1			1
Premnotrypes suturicallus	Curculionidae	Coleoptera							1																1			1													1			1				1
Premnotrypes vorax	Curculionidae	Coleoptera							1																1			1													1			1
Pseudopityophthorus minutissimus	Scolytidae	Coleoptera																																		1
Pterandrus rosa	Tephritidae	Diptera					1
Quadraspidiotus perniciosus	Diaspididae	Hemiptera	1	1	1								1	1																	1					1						1
Rhacochlaena japonica	Tephritidae	Diptera
Rhagoletis cingulata	Tephritidae	Diptera																																		1
Rhagoletis completa	Tephritidae	Diptera
Rhagoletis fausta	Tephritidae	Diptera																																		1
Rhagoletis indifferens	Tephritidae	Diptera																																		1
Rhagoletis mendax	Tephritidae	Diptera																																		1
Rhagoletis pomonella	Tephritidae	Diptera																																		1
Rhagoletis ribicola	Tephritidae	Diptera																																		1
Rhagoletis suavis	Tephritidae	Diptera
Rhynchophorus palmarum	Curculionidae	Coleoptera							1												1				1			1																1				1
Scaphoideus luteolus	Cicadellidae	Hemiptera																																		1
Scirtothrips aurantii	Thripidae	Thysanoptera					1																														1
Scirtothrips citri	Thripidae	Thysanoptera
Scolytus morawitzi	Scolytidae	Coleoptera
Sirex ermak	Siricidae	Hymenoptera
Spodoptera eridania	Noctuidae	Lepidoptera																										1													1
Spodoptera frugiperda	Noctuidae	Lepidoptera						1	1						1			1			1		1					1								1			1		1			1				1
Strobilomyia viaria	Anthomyidae	Diptera																																		1						1
Tecia solanivora	Gelechiidae	Lepidoptera																																										1				1
Tetranychus evansi	Acari	Acari							1																			1																		1
Tetropium gracilicorne	Cerambycidae	Coleoptera																																								1
Toxoptera citricida	Aphididae	Hemiptera						1	1			1													1			1					1		1				1		1			1		1	1	1
Trioza erytreae	Triozidae	Hemiptera																																	1										1
Trogoderma granarium	Dermestidae	Coleoptera	1		1								1				1															1
Tuta absoluta	Gelechiidae	Lepidoptera							1																1			1													1			1
Unaspis citri	Diaspididae	Hemiptera						1	1			1						1				1	1		1			1	1						1						1	1		1		1	1		1
Xylotrechus altaicus	Cerambycidae	Coleoptera
Xylotrechus namanganensis	Cerambycidae	Coleoptera	1																																							1
Agrilus anxius	Buprestidae	Coleoptera																																		1
Chrysophtharta bimaculata	Chrysomelidae	Coleoptera										1
Diaphania perspectalis	Pyralidae	Lepidoptera
Diocalandra frumenti	Curculionidae	Coleoptera										1					1
Drosophila suzukii	Drosophilidae	Diptera																																		1						1
Enaphalodes rufulus	Cerambycidae	Coleoptera																																		1
Epitrix similaris	Chrysomelidae	Coleoptera
Halyomorpha halys	Pentatomidae	Hemiptera																																								1
Psacothea hilaris	Cerambycidae	Coleoptera																																								1
Saperda candida	Cerambycidae	Coleoptera																																		1
Xylosandrus crassiusculus	Scolytidae	Coleoptera																						1											1							1						1	1
[truncated: 290 more columns]
